# Supplementary material for: Meridional circulation dominates the record-breaking “Dragon Boat Water” rainfall over south China in 2022
Source: Frontiers journal article supplement (doi:10.3389/feart.2022.1032313), 2023-01-09
Supplement: Table_1.DOCX [file Table_1.DOCX]

Supplementary Material


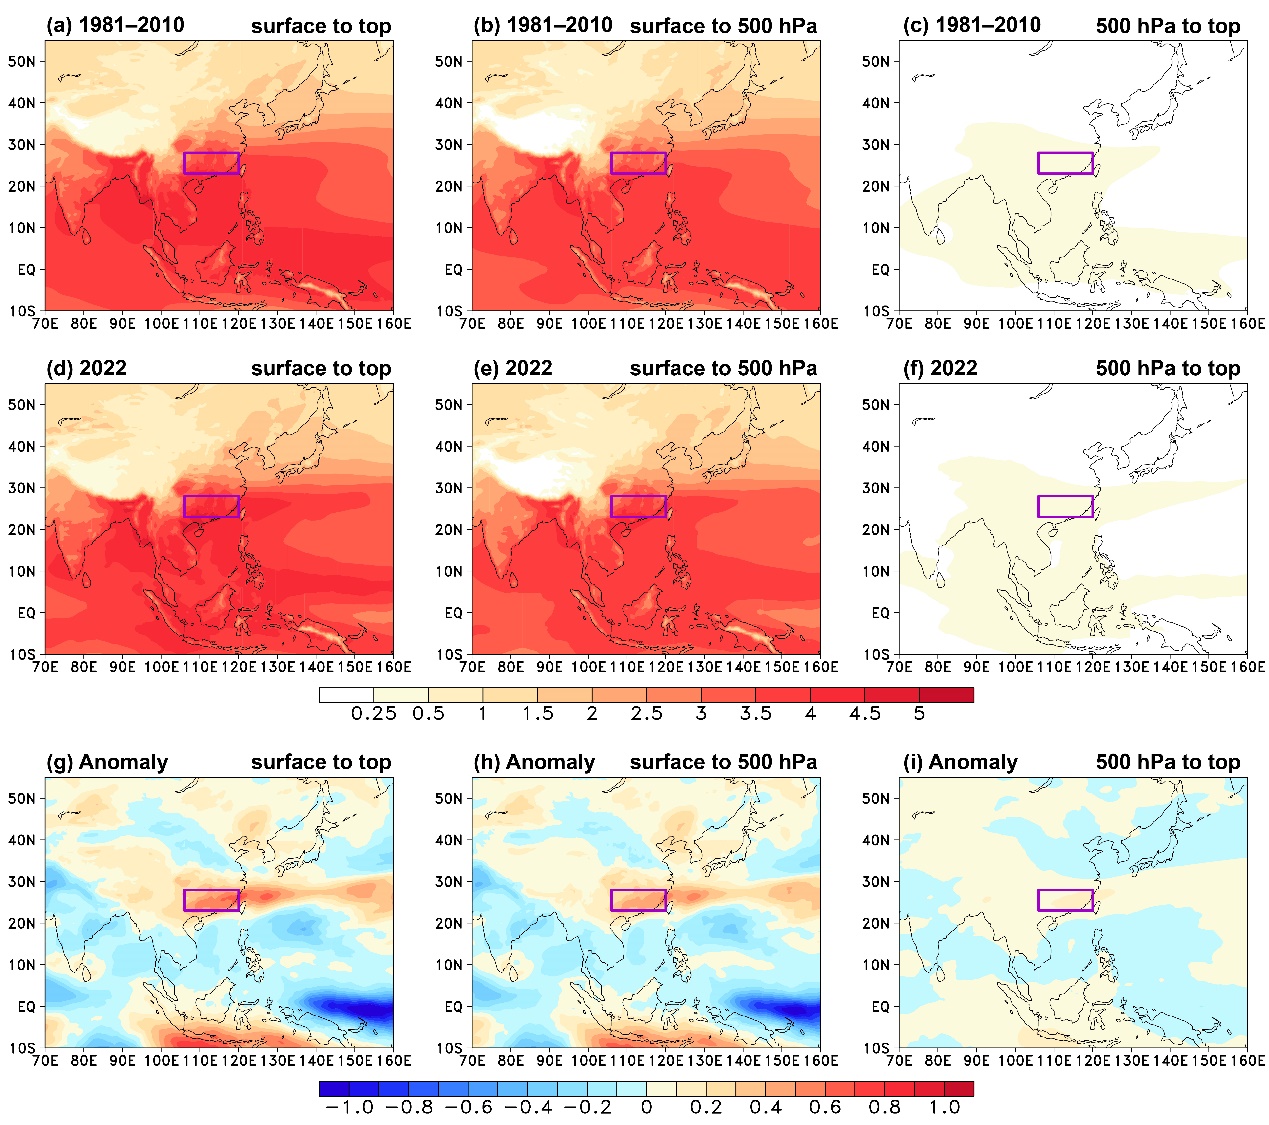


**Supplementary Figure 1 (Figure S1).** Distribution of the vertical integration of the climatological specific humidity from (**a**) surface to the top of atmosphere, (**b**) surface to 500 hPa, and (**c**) 500 hPa to the top of atmosphere in the "Dragon Boat Water" period during 1981–2010. (**d**)–(**f**) and (**g**)–(**i**) are the same as (**a**)–(**c**) but for the vertical integration of the specific humidity and specific humidity anomaly in 2022. The units are 104 Pa kg kg–1.
